# Supplementary material for: Promotion effect of Ag on syngas transformation to long-chain alcohols over CuFe catalysts
Source: Royal Society of Chemistry journal article supplement (doi:10.1039/d4cc05510a), 2024-11-27
Supplement: d4cc05510a1.pdf [file d4cc05510a1.pdf]

**Supporting Information for**

**Promotion Effect of Ag on Syngas Transformation to Long-  
chain Alcohols over CuFe Catalysts**

**Zhiwei Qin,<sup>a</sup> Yinwen Li,<sup>\*a</sup> Meng Wang,<sup>b</sup> Yanrui Su<sup>c</sup>, Wa Gao<sup>\*c</sup>, Ding Ma<sup>b</sup> and Lin  
Yang<sup>a</sup>**

<sup>a</sup> *Department of Novel materials institute, Central Research Institute of China Chemical Science and Technology Co. Ltd., Haohua Chemical Science & Technology Corp., Ltd., Beijing 100083, P. R. China*

<sup>b</sup> *Beijing National Laboratory for Molecular Sciences, College of Chemistry and Molecular Engineering, Peking University, Beijing, 100871, P. R. China*

<sup>c</sup> *Key Laboratory for Northern Urban Agriculture of Ministry of Agriculture and Rural Affairs, College of Bioscience and Resources Environment, Beijing University of Agriculture, Beijing 102206, China*

\* Corresponding authors: liyinwen@sinochem.com (Y. Li); gaowa@bua.edu.cn (W. Gao).

## Experimental section

### 1. Catalysts synthesis

The CuFeM<sub>1</sub>-LDH precursors with eight different elements of Mo, In, Ag, Cr, Ga, Mn, Nb and Re were prepared by using nucleation and aging separation method. This method was modified by using KOH and K<sub>2</sub>CO<sub>3</sub> as precipitating agents and changing the colloid mill rotating to 4000 rpm. The CuFeM<sub>1</sub>-LDHs precursors were directly reduced in syngas atmosphere consisting of 25% CO + 25% H<sub>2</sub> + 50% CO<sub>2</sub> with a two-step-process: 300 °C for 2 h and 350 °C for 1 h at a heating rate of 2 °C min<sup>-1</sup> (denoted as Cu<sub>4</sub>Fe<sub>1</sub>M<sub>1</sub>, respectively).

CuFeAg<sub>x</sub> samples with other three Ag loadings ( $x=0.5, 0.1$  and  $0.05$ ) and three control samples (Cu<sub>4</sub>Fe<sub>1</sub>, Cu<sub>4</sub>Ag<sub>0.5</sub> and Fe<sub>1</sub>Ag<sub>0.5</sub>) were prepared by the same above method.

### 2. Catalytic evaluation

The catalytic evaluation was carried out in a fixed-bed stainless steel reactor. 0.5 g of catalyst was loaded in 10 mm inner diameter quartz tube inside. Before reaction, the LDHs precursors was activated *in situ* as mentioned above with a flow rate of 20 mL min<sup>-1</sup>. After the reactor was cooled to room temperature, syngas with a flow rate of 20 mL min<sup>-1</sup> (32% CO + 64% H<sub>2</sub> + 4% Ar) was introduced to reach the required pressure with argon as an internal standard gas. The reaction was conducted at 260 °C. The modulation of reaction conditions was based on above criteria.

The outlet gas components (CO, H<sub>2</sub>, CH<sub>4</sub>, CO<sub>2</sub> and Ar) after passing through a hot trap (120 °C) and a cold trap (5 °C) were determined using Agilent 7890A gas chromatography with TCD detector (5A molecular sieve column and Plot Q column) and FID detector (Al<sub>2</sub>O<sub>3</sub> capillary column) using He as carrier gas. The liquid products were collected from the hot trap and cold trap, followed by determination offline with FID detector (Heavy hydrocarbons were analyzed by HP-5 column and oxygenates were quantified by HP-INNOWAX column). 1,4-dioxane was used as internal standard for the aqueous products; and decalin was used as internal standard for the oily products.

$$\text{CO conversion was defined as: CO conversion (\%)} = \frac{F_{CO,in} - F_{CO,out}}{F_{CO,in}} \times 100 \quad (1)$$

$$\text{Product selectivity was defined as: Selectivity (mol \%)} = \frac{F_{Ci} \times i}{F_{CO,in} - F_{CO,out}} \times 100 \quad (2)$$

Where  $F$  is the moles of CO and product  $Ci$  (CO<sub>2</sub>, hydrocarbon or alcohols) containing  $i$

carbon atoms. The mass balance and carbon balance have been calculated at each product and kept between 90% and 93%.

### **3. Characterizations of catalysts**

Powder XRD measurements were performed on a Rigaku XRD-6000 diffractometer, using Cu K $\alpha$  radiation ( $\lambda = 0.15418$  nm) at 40 kV and 30 mA, with a scanning rate of 5° min<sup>-1</sup> and a  $2\theta$  angle ranging from 3° to 90°. Scanning electron microscope (SEM; Zeiss SUPRA 55) with an accelerating voltage of 20 kV was performed. The phases of components were identified based on JCPDS standard cards. The scanning transmission electron microscopy (STEM) and EDX mapping measurements were performed on a FEI Tecnai G2 F20 microscope with an accelerating voltage of 120 kV. The specific surface area determination and pore volume analysis were performed by Brunauer-Emmett-Teller (BET) and Barret-Joyner-Halenda (BJH) methods using a Quantachrome Autosorb-1C-VP Analyzer. Elemental analysis for Cu and Fe was performed using a Shimadzu ICPS-75000 inductively coupled plasma atomic emission spectrometer (ICP-AES).

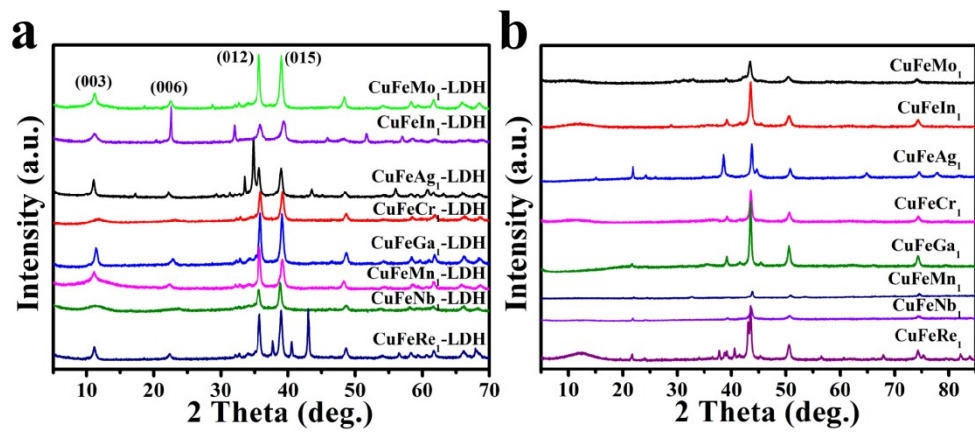

**Figure S1.** XRD patterns of (a) CuFeM<sub>1</sub>-LDH precursors and (b) CuFeM<sub>1</sub> catalysts with different elements.

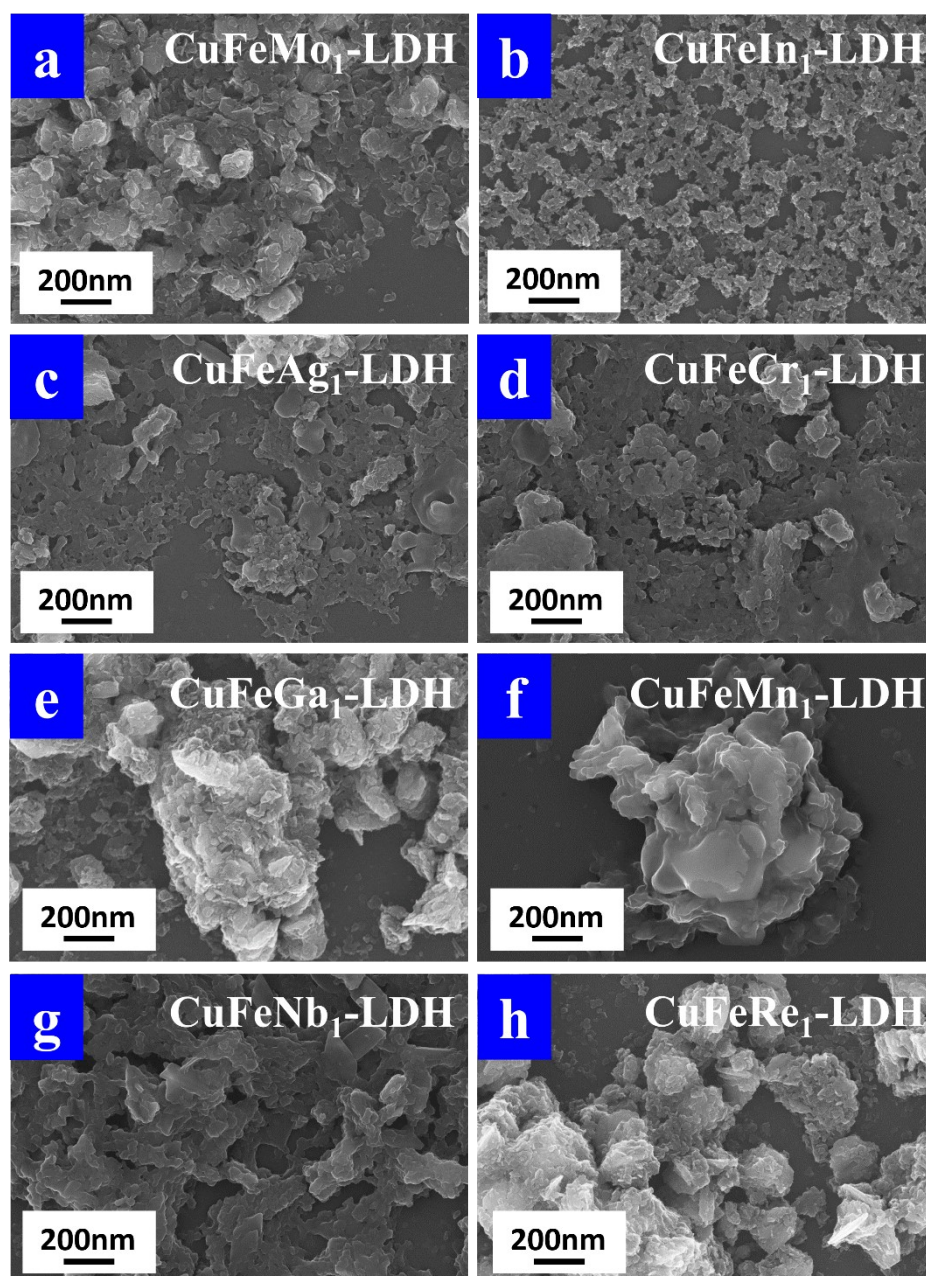

Figure S2. SEM images of CuFeM<sub>1</sub>-LDH with different promoter elements.

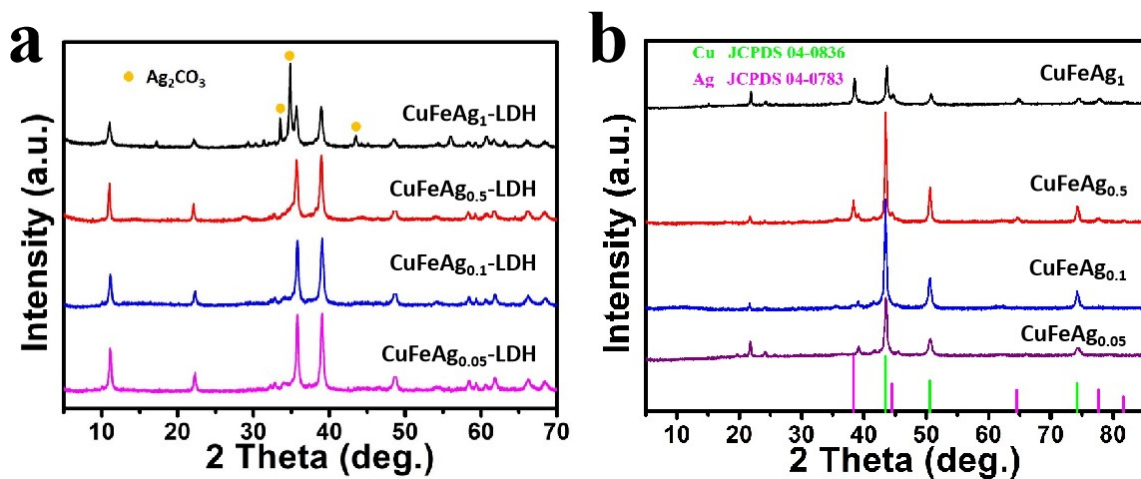

**Figure S3.** XRD patterns of (a) CuFeAg<sub>x</sub>-LDH precursors and (b) CuFeAg<sub>x</sub> catalysts with different Ag/(Cu + Fe) ratios.

**Table S1.** Catalytic performances of samples with various promoters

| Catalysts <sup>a,b</sup> | Conv. [%] | Selectivity[%]  |                  |                   |      |                 | Alcohols distribution[%] <sup>c</sup> |           |           |           |                   |
|--------------------------|-----------|-----------------|------------------|-------------------|------|-----------------|---------------------------------------|-----------|-----------|-----------|-------------------|
|                          |           | CH <sub>4</sub> | C <sub>2+H</sub> | C <sub>2+=H</sub> | ROH  | CO <sub>2</sub> | MeOH                                  | EtOH      | PrOH      | BuOH      | C <sub>5+OH</sub> |
| CuFeMo <sub>1</sub>      | 21.4      | 33.2            | 7.7              | 7.9               | 11.8 | 39.4            | 45.7(5.4)                             | 36.3(4.3) | 10.4(1.2) | 4.8(0.6)  | 2.8(0.3)          |
| CuFeIn <sub>1</sub>      | 1.8       | 58.1            | 8.3              | 11.0              | –    | 22.6            | –                                     | –         | –         | –         | –                 |
| CuFeAg <sub>1</sub>      | 40.1      | 8.1             | 28.6             | 18.4              | 18.9 | 26.9            | 9.9(1.9)                              | 28.3(5.3) | 10.8(2.0) | 8.5(1.6)  | 42.5(8.1)         |
| CuFeCr <sub>1</sub>      | 6.1       | 5.7             | 25.3             | 13.0              | 10.6 | 45.4            | 69.8(7.4)                             | 21.7(2.3) | 8.5(0.9)  | –         | –                 |
| CuFeGa <sub>1</sub>      | 15.8      | 10.9            | 20.4             | 27.7              | 12.8 | 28.2            | 34.6(4.4)                             | 44.8(5.7) | 12.9(1.7) | 5.3(0.7)  | 2.4(0.3)          |
| CuFeMn <sub>1</sub>      | 20.1      | 6.7             | 19.7             | 30.3              | 13.8 | 29.5            | 8.9(1.2)                              | 46.4(6.4) | 8.1(1.1)  | 5.5(0.8)  | 31.1(4.3)         |
| CuFeNb <sub>1</sub>      | 15.4      | 2.8             | 25.7             | 29.6              | 13.3 | 28.6            | 26.3(3.5)                             | 46.3(6.2) | 14.2(1.9) | 8.2(1.1)  | 5.0(0.6)          |
| CuFeRe <sub>1</sub>      | 28.6      | 9.8             | 30.7             | 17.7              | 11.7 | 30.1            | 23.6(2.8)                             | 26.9(3.1) | 13.9(1.6) | 12.1(1.4) | 23.5(2.8)         |

<sup>a</sup> Activation conditions: 0.5 g precursor, H<sub>2</sub>: CO: CO<sub>2</sub>=1: 1: 2 (40 mL min<sup>-1</sup>), 2 °C min<sup>-1</sup>, 300 °C 2 h + 350 °C 1 h.

<sup>b</sup> Reaction conditions: 2 MPa, 260 °C, H<sub>2</sub>/CO=2, 3000 mL g<sub>cat</sub><sup>-1</sup> h<sup>-1</sup>.

<sup>c</sup> Normalized data to S<sub>ROH</sub>, mol% in brackets.

**Table S2.** Catalytic performances of samples with various Ag loadings

| Catalysts <sup>a,b</sup> | Conv. [%] | Selectivity[mol%] |                   |                    |      |                 | Alcohols distribution[%] <sup>c</sup> |           |           |          |                    |
|--------------------------|-----------|-------------------|-------------------|--------------------|------|-----------------|---------------------------------------|-----------|-----------|----------|--------------------|
|                          |           | CH <sub>4</sub>   | C <sub>2+</sub> H | C <sub>2+</sub> =H | ROH  | CO <sub>2</sub> | MeOH                                  | EtOH      | PrOH      | BuOH     | C <sub>5+</sub> OH |
| CuFeAg <sub>1</sub>      | 40.1      | 8.1               | 28.6              | 18.4               | 18.9 | 26.9            | 9.9(1.9)                              | 28.3(5.3) | 10.8(2.0) | 8.5(1.6) | 42.5(8.1)          |
| CuFeAg <sub>0.5</sub>    | 70.1      | 4.7               | 25.3              | 12.8               | 25.4 | 31.8            | 12.7(3.2)                             | 25.1(6.4) | 12.5(3.2) | 5.6(1.4) | 44.1(11.2)         |
| CuFeAg <sub>0.1</sub>    | 54.8      | 6.7               | 32.9              | 17.1               | 11.4 | 31.9            | 18.1(2.1)                             | 31.1(3.5) | 9.9(1.1)  | 4.9(0.6) | 36.0(4.1)          |
| CuFeAg <sub>0.05</sub>   | 31.7      | 9.0               | 28.7              | 18.2               | 11.5 | 32.6            | 15.0(1.7)                             | 27.3(3.1) | 9.6(1.1)  | 4.7(0.6) | 43.4(5.0)          |

<sup>a</sup> Activation conditions: 0.5 g precursor, H<sub>2</sub>: CO: CO<sub>2</sub>=1: 1: 2 (40 mL min<sup>-1</sup>), 2 °C min<sup>-1</sup>, 300 °C 2 h + 350 °C 1 h.

<sup>b</sup> Reaction conditions: 2 MPa, 260 °C, H<sub>2</sub>/CO=2, 3000 mL g<sub>cat</sub><sup>-1</sup> h<sup>-1</sup>.

<sup>c</sup> Normalized data to S<sub>ROH</sub>, mol% in brackets.



**Table S3.** Catalytic performances of control samples

| Catalysts <sup>a,b</sup>          | Conv. [%] | Selectivity[%]  |                   |                   |      |                 | Alcohols distribution[%] <sup>c</sup> |               |               |              |                    | Total alcohols STY [g g <sub>cat</sub> <sup>-1</sup> h <sup>-1</sup> ] | LA STY [g g <sub>cat</sub> <sup>-1</sup> h <sup>-1</sup> ] |
|-----------------------------------|-----------|-----------------|-------------------|-------------------|------|-----------------|---------------------------------------|---------------|---------------|--------------|--------------------|------------------------------------------------------------------------|------------------------------------------------------------|
|                                   |           | CH <sub>4</sub> | C <sub>2</sub> +H | C <sub>2</sub> +H | ROH  | CO <sub>2</sub> | MeOH                                  | EtOH          | PrOH          | BuOH         | C <sub>5</sub> +OH |                                                                        |                                                            |
| Cu <sub>4</sub> Fe <sub>1</sub>   | 47.6      | 8.8             | 24.2              | 22.1              | 19.7 | 25.2            | 11.6<br>(2.3)                         | 30.3<br>(6.0) | 14.1<br>(2.8) | 6.2<br>(1.2) | 37.8<br>(7.4)      | 0.14                                                                   | 0.051                                                      |
| CuFeAg <sub>0.5</sub>             | 70.1      | 4.7             | 25.3              | 12.8              | 25.4 | 31.8            | 12.7<br>(3.2)                         | 25.1<br>(6.4) | 12.5<br>(3.2) | 5.6<br>(1.4) | 44.1<br>(11.2)     | 0.29                                                                   | 0.139                                                      |
| Cu <sub>4</sub> Ag <sub>0.5</sub> | 9.9       | 26.0            | 6.2               | -                 | 61.5 | 6.3             | 91.0<br>(56.0)                        | 4.3<br>(2.6)  | 1.3<br>(0.8)  | 1.0<br>(0.6) | 2.4<br>(1.5)       | 0.09                                                                   | 0.002                                                      |
| Fe <sub>1</sub> Ag <sub>0.5</sub> | 39.0      | 10.1            | 21.3              | 14.9              | -    | 53.7            | -                                     | -             | -             | -            | -                  | -                                                                      | -                                                          |

<sup>a</sup> Activation conditions: 0.5 g precursor, H<sub>2</sub>: CO: CO<sub>2</sub>=1: 1: 2 (40 mL min<sup>-1</sup>), 2 °C min<sup>-1</sup>, 300 °C 2 h + 350 °C 1 h.

<sup>b</sup> Reaction conditions: 2 MPa, 260 °C, H<sub>2</sub>/CO=2, 3000 mL g<sub>cat</sub><sup>-1</sup> h<sup>-1</sup>.

<sup>c</sup> Normalized data to S<sub>ROH</sub>, mol% in brackets.

**Table S4.** Catalytic performance data for a variety of modified FT catalysts used in LAS

| Catalyst                                                                             | H <sub>2</sub> /CO ratio | Temperature /°C | Pressure /MPa | GHSV/WHSV                                               | CO conversion/% | Total alcohol Selectivity/% | Long-chain alcohol selectivity/% | Total alcohols STY <sup>a</sup> | Long-chain alcohols STY <sup>a</sup> | reference                                                           |
|--------------------------------------------------------------------------------------|--------------------------|-----------------|---------------|---------------------------------------------------------|-----------------|-----------------------------|----------------------------------|---------------------------------|--------------------------------------|---------------------------------------------------------------------|
| CuFeAg <sub>0.5</sub>                                                                | 2                        | 260             | 2             | 3000 mL g <sub>cat</sub> <sup>-1</sup> h <sup>-1</sup>  | 70.1            | 25.4                        | 44.1                             | 0.29                            | 0.139                                | This work                                                           |
| Cu <sub>4</sub> Fe <sub>1</sub>                                                      | 2                        | 260             | 1             | 2400 mL g <sub>cat</sub> <sup>-1</sup> h <sup>-1</sup>  | 53.2            | 29.8                        | 49.1                             | 0.20                            | 0.101                                | <i>Nat Commun.</i> <b>2020</b> , <i>11</i> , 61<br>Previous work    |
| CNF-2-0.005                                                                          | 2                        | 270             | 5             | 16000 mL g <sub>cat</sub> <sup>-1</sup> h <sup>-1</sup> | 12              | 50                          |                                  | 0.38                            |                                      | <i>ACS Catal.</i> <b>2018</b> , <i>8</i> , 9604–9618                |
| CuFeCo                                                                               | 2                        | 350             | 5.5           | 6000 h <sup>-1</sup>                                    | 72              | 12.5                        | 6                                | 0.25                            | 0.015                                | <i>Appl. Catal. A</i> <b>2015</b> , <i>503</i> , 51-61              |
| CuZnFeMn                                                                             | 2                        | 280             | 4             | 6000 h <sup>-1</sup>                                    | 59.37           | 31.04                       | 3.65                             | 0.26                            | 0.016                                | <i>Catal. Commun.</i> <b>2008</b> , <i>9</i> , 1869-1873            |
| Fe/K/ Mo <sub>2</sub> C(Fe/Mo=1/14)                                                  | 2                        | 320             | 7             | 4000 h <sup>-1</sup>                                    | 50.25           | 22.69                       | 0.62                             | 0.14                            | 0.001                                | <i>Catal. Lett.</i> <b>2010</b> , <i>136</i> , 9-13                 |
| S2-CuFeMg-Cat                                                                        | 2                        | 300             | 4             | 2000 h <sup>-1</sup>                                    | 56.89           | 49.07                       | 11.25                            | 0.28                            | 0.032                                | <i>Catal. Sci. Technol.</i> <b>2013</b> , <i>3</i> , 1324-1332      |
| 3DOM Cu <sub>2</sub> Fe <sub>1</sub>                                                 | 1                        | 220             | 4.8           | 2000 h <sup>-1</sup>                                    | 12.9            | 47.6                        | 62.4                             | 0.23                            | 0.144                                | <i>ChemCatChem</i> <b>2014</b> , <i>6</i> , 473-478                 |
| CuFeK0.5M                                                                            | 2                        | 320             | 5             | 6000 h <sup>-1</sup>                                    | 53              | 61                          | NA                               | 0.32                            | NA                                   | <i>Fuel Process. Technol.</i> <b>2017</b> , <i>159</i> , 436-441    |
| CF <sub>0.5</sub>                                                                    | 2                        | 260             | 4             | 5000 h <sup>-1</sup>                                    | 17.99           | 20.77                       | 2.5                              | 0.05                            | 0.001                                | <i>J. Colloid Interface Sci.</i> <b>2016</b> , <i>470</i> , 162-171 |
| Fe-CuMnZrO <sub>2</sub> (I)                                                          | 2                        | 310             | 8             | 8000 h <sup>-1</sup>                                    | 45.5            | 26.2                        | 3                                | 0.45                            | 0.014                                | <i>J. Mol. Catal. A: Chem.</i> <b>2004</b> , <i>221</i> , 51-58     |
| CuFe NPs                                                                             | 2                        | 220             | 6             | 6000 h <sup>-1</sup>                                    | 17.1            | 21.9                        | 64                               | 0.14                            | 0.085                                | <i>J. Mol. Catal. A: Chem.</i> <b>2013</b> , <i>378</i> , 319-325   |
| Fe-Cu/Al <sub>2</sub> O <sub>3</sub> (Al <sub>2</sub> O <sub>3</sub> loading: 89.3%) | 2.68                     | 380             | 4             | 10000 h <sup>-1</sup>                                   | NA              | 62.3                        | NA                               | 0.044                           | NA                                   | <i>J. Nat. Gas Chem.</i> <b>2008</b> , <i>17</i> , 327-331          |
| CuFeCrNi/CNTs                                                                        | 2                        | 400             | 4             | 5000 h <sup>-1</sup>                                    | 44              | 46                          |                                  | 0.021                           |                                      | <i>React. Kinet. Mech. Cat.</i> <b>2019</b> , <i>128</i> , 695-706  |
| Cu-Fe@ HHSS                                                                          | 2                        | 300             | 3             | 5000 h <sup>-1</sup>                                    | 65.1            | 46.6                        |                                  | 0.118                           |                                      | <i>Appl. Catal. A</i> <b>2020</b> , <i>608</i> , 117868             |
| CoBa/AC                                                                              | 2                        | 220             | 3             | 2000 h <sup>-1</sup>                                    | 30.4            | 23.3                        | 57                               |                                 |                                      | <i>Catal. Lett.</i> <b>2021</b> , 10.1007/s10562-021-03602-y        |
| 1.1Rh-CoMn                                                                           | 1                        | 220             | 6             | 2000 mL g <sub>cat</sub> <sup>-1</sup> h <sup>-1</sup>  | 33.1            | 40.9                        |                                  | 0.071                           |                                      | <i>Appl. Catal. B</i> <b>2021</b> , <i>285</i> , 119840             |

|                                                       |   |     |   |                                                        |      |      |      |                                     |       |                                                       |
|-------------------------------------------------------|---|-----|---|--------------------------------------------------------|------|------|------|-------------------------------------|-------|-------------------------------------------------------|
| <b>Co<sub>4</sub>Mn<sub>1</sub>K<sub>0.1</sub></b>    | 5 | 220 | 4 | 3600 h <sup>-1</sup>                                   | 34   | 44   | 22   | 0.20                                | 0.044 | <i>Nat Commun.</i> <b>2016</b> , 7, 13058-13064       |
| <b>CoCuMn</b>                                         | 2 | 200 | 6 | 3600 h <sup>-1</sup>                                   | 3    | 52   | 65   | 0.12                                | 0.078 | <i>J. Am. Chem. Soc.</i> <b>2013</b> , 135, 7114-7117 |
| <b>0.4Na-Co/AC</b>                                    | 2 | 220 | 3 | 2000 mL g <sub>cat</sub> <sup>-1</sup> h <sup>-1</sup> | 15.8 | 29.2 | 45   | 0.34                                | 0.153 | <i>Appl. Catal. A</i> <b>2020</b> , 602, 117704       |
| <b>CoGa-ZnAl-LDO/<br/>Al<sub>2</sub>O<sub>3</sub></b> | 2 | 260 | 3 | 2000 h <sup>-1</sup>                                   | 43.5 | 59   | 37.7 | 0.24                                | 0.091 | <i>J. Catal.</i> <b>2016</b> , 340, 236-247           |
| <b>Cu@(CuCo-alloy)/Al<sub>2</sub>O<sub>3</sub></b>    | 2 | 220 | 2 | 2000 mL g <sub>cat</sub> <sup>-1</sup> h <sup>-1</sup> | 21.5 | 50.6 | 48.9 | 0.21                                | 0.103 | <i>Green Chem.</i> <b>2015</b> , 17, 1525-1534        |
| <b>a</b>                                              |   |     |   | <b>g</b>                                               |      |      |      | <b>g<sub>cat</sub><sup>-1</sup></b> |       | <b>h<sup>-1</sup></b>                                 |

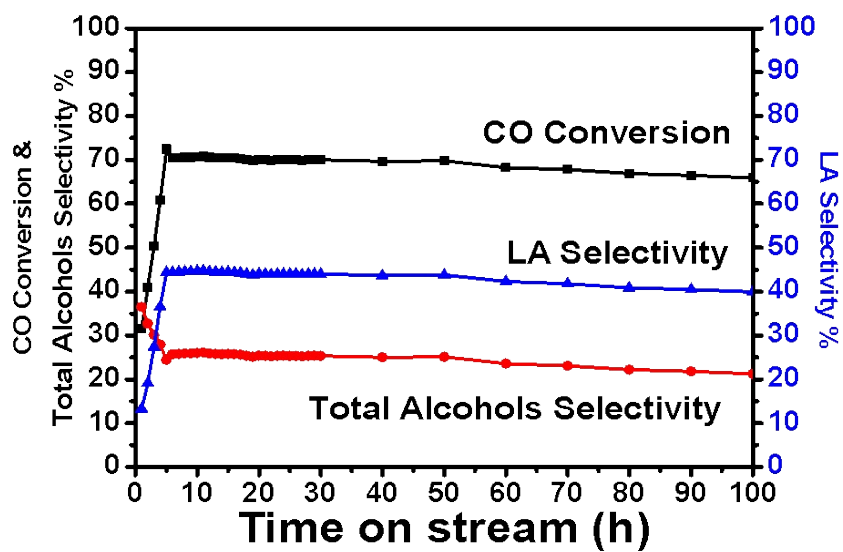

**Figure S4.** Time-on-stream (TOS) evolution of CO conversion, total alcohols selectivity and LA selectivity over the CuFeAg<sub>0.5</sub> catalyst within 100 h test.

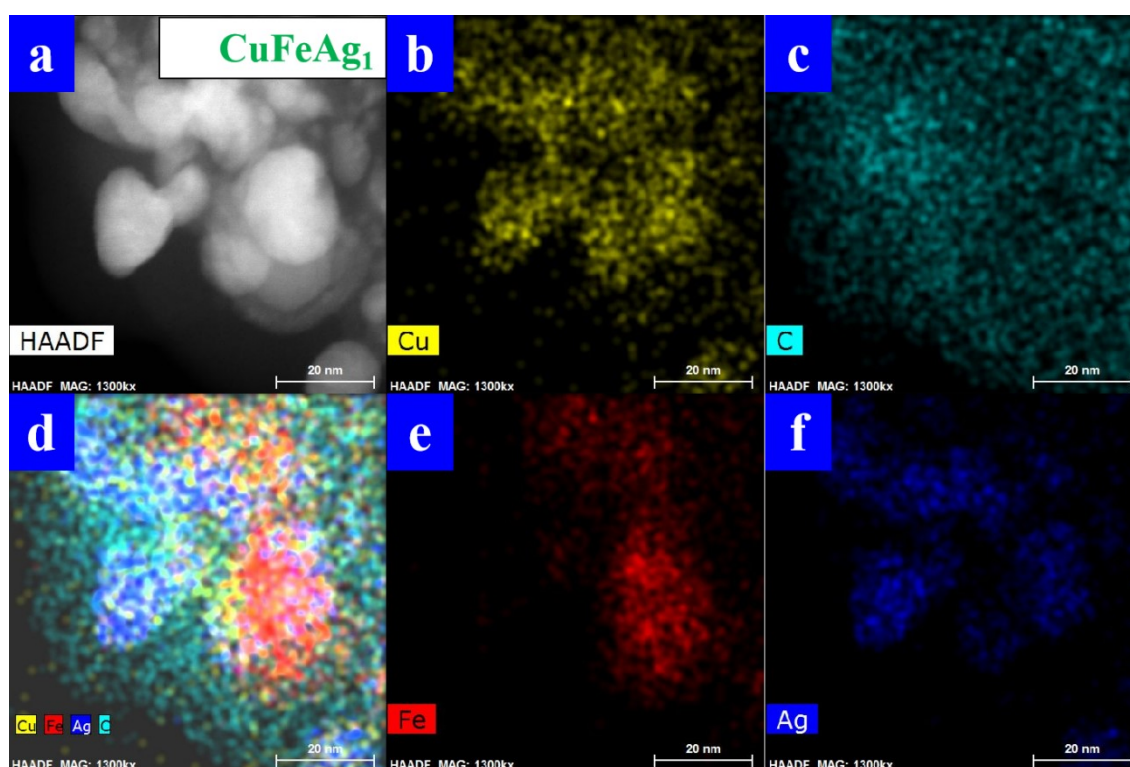

**Figure S5.** (a) HAADF-STEM images of CuFeAg<sub>1</sub> catalyst. (b, c, d, e and f) EDS mapping of elemental distribution for Cu, Fe, C and Ag, respectively.

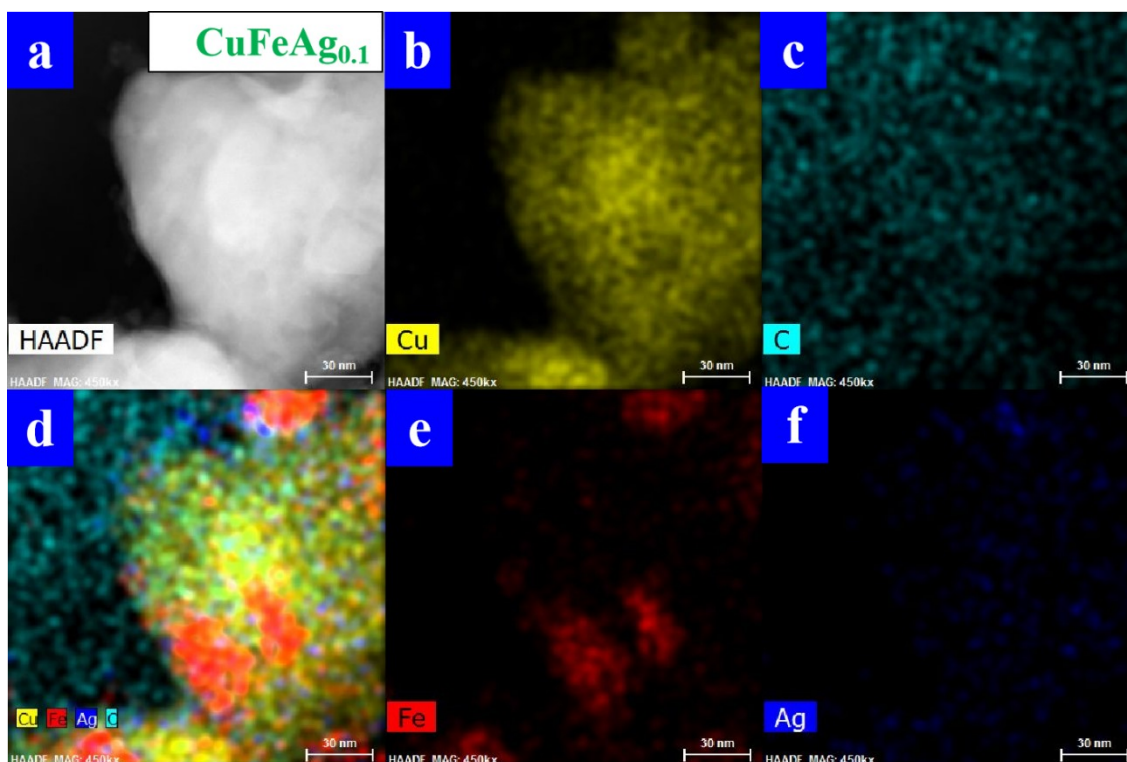

**Figure S6.** (a) HAADF-STEM images of CuFeAg<sub>0.1</sub> catalyst. (b, c, d, e and f) EDS mapping of elemental distribution for Cu, Fe, C and Ag, respectively.

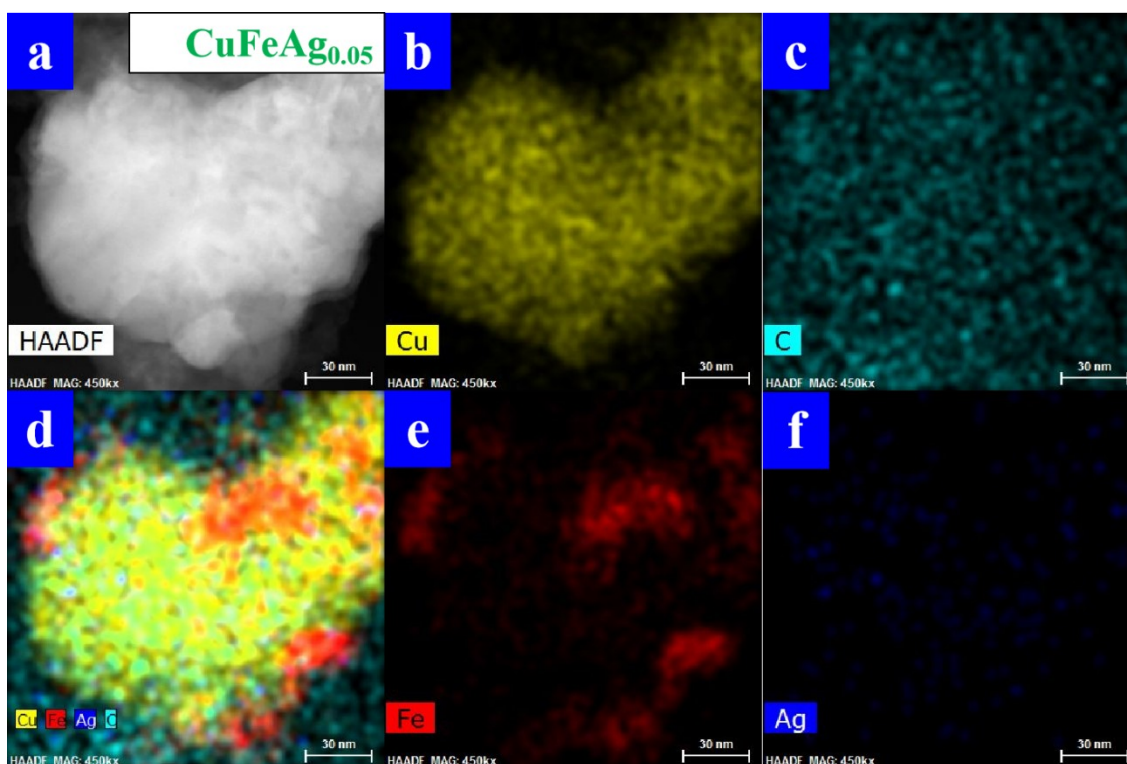

**Figure S7.** (a) HAADF-STEM images of CuFeAg<sub>0.05</sub> catalyst. (b, c, d, e and f) EDS mapping of elemental distribution for Cu, Fe, C and Ag, respectively.

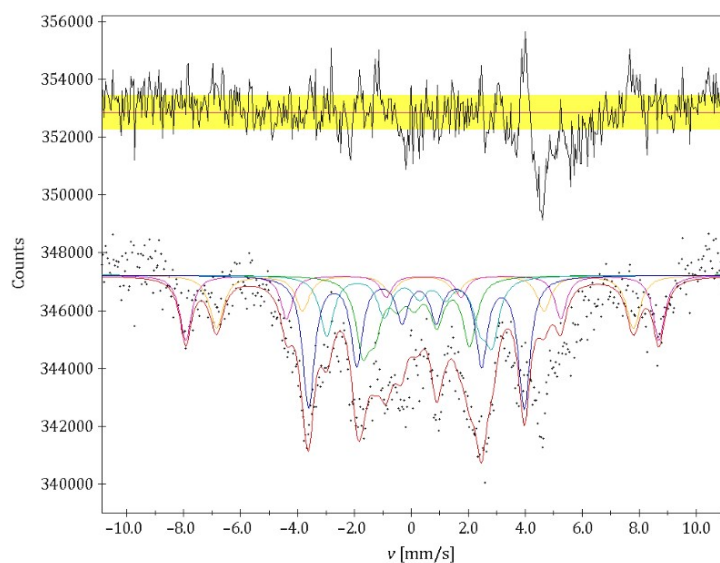

**Figure S8.** Mössbauer spectrum of CuFeAg<sub>0.5</sub> sample.

**Table S5.** Physicochemical properties of various catalysts

| Sample                 | BET surface area (m <sup>2</sup> g <sup>-1</sup> ) | Ag/(Cu + Fe) ratio <sup>a</sup> | Cu Crystallite size <sup>b</sup> (nm) | Mean Cu particle size <sup>c</sup> (nm) |
|------------------------|----------------------------------------------------|---------------------------------|---------------------------------------|-----------------------------------------|
| CuFeAg <sub>1</sub>    | 22.38                                              | 0.21                            | 25.7                                  | 24.6                                    |
| CuFeAg <sub>0.5</sub>  | 20.07                                              | 0.10                            | 46.4                                  | 44.8                                    |
| CuFeAg <sub>0.1</sub>  | 21.77                                              | 0.02                            | 45.1                                  | 44.2                                    |
| CuFeAg <sub>0.05</sub> | 25.96                                              | 0.01                            | 33.6                                  | 32.9                                    |

<sup>a</sup> Cu/Fe ratio was determined by inductively coupled plasma-atomic emission spectroscopy (ICP-AES).

<sup>b</sup> Crystallite size was determined by XRD with the Scherrer equation.

<sup>c</sup> Mean Cu particle size was determined by mapping images.

**Table S6.** Catalytic performances of CuFeAg<sub>0.5</sub> under various reaction temperature<sup>a,b</sup>

| Temp.<br>[°C] | Conv.<br>[%] | Selectivity[mol%] |                   |                   |      |                 | Alcohols distribution[%] <sup>c</sup> |                |               |               |                    | Total alcohols<br>STY<br>[g g <sub>cat</sub> <sup>-1</sup> h <sup>-1</sup> ] | LA<br>STY<br>[g g <sub>cat</sub> <sup>-1</sup> h <sup>-1</sup> ] |
|---------------|--------------|-------------------|-------------------|-------------------|------|-----------------|---------------------------------------|----------------|---------------|---------------|--------------------|------------------------------------------------------------------------------|------------------------------------------------------------------|
|               |              | CH <sub>4</sub>   | C <sub>2+</sub> H | C <sub>2+=H</sub> | ROH  | CO <sub>2</sub> | MeOH                                  | EtOH           | PrOH          | BuOH          | C <sub>5+</sub> OH |                                                                              |                                                                  |
| 220           | 12.2         | 14.6              | 21.3              | 18.6              | -    | 45.5            | -                                     | -              | -             | -             | -                  | -                                                                            | -                                                                |
| 240           | 21.6         | 5.9               | 9.0               | 7.7               | 35.6 | 41.8            | 18.7<br>(6.7)                         | 41.7<br>(14.8) | 14.9<br>(5.3) | 11.3<br>(4.0) | 13.4<br>(4.8)      | 0.11                                                                         | 0.016                                                            |
| 260           | 70.1         | 4.7               | 25.3              | 12.8              | 25.4 | 31.8            | 12.7<br>(3.2)                         | 25.1<br>(6.4)  | 12.5<br>(3.2) | 5.6<br>(1.4)  | 44.1<br>(11.2)     | 0.29                                                                         | 0.139                                                            |
| 280           | 82.9         | 9.5               | 18.8              | 14.8              | 10.7 | 46.2            | 7.8<br>(0.8)                          | 28.7<br>(3.1)  | 7.7<br>(0.8)  | 4.2<br>(0.4)  | 51.6<br>(5.6)      | 0.14                                                                         | 0.074                                                            |
| 300           | 96.6         | 18.7              | 22.5              | 20.5              | 3.6  | 34.7            | 12.2<br>(0.4)                         | 54.3<br>(2.0)  | 14.1<br>(0.5) | 6.5<br>(0.2)  | 12.9<br>(0.5)      | 0.05                                                                         | 0.008                                                            |

<sup>a</sup> Activation conditions: 0.5 g precursor, H<sub>2</sub>: CO: CO<sub>2</sub>=1: 1: 2 (40 mL min<sup>-1</sup>), 2 °C min<sup>-1</sup>, 300 °C 2 h + 350 °C 1 h.

<sup>b</sup> Reaction conditions: 2 MPa, H<sub>2</sub>/CO=2, 3000 mL g<sub>cat</sub><sup>-1</sup> h<sup>-1</sup>.

<sup>c</sup> Normalized data to S<sub>ROH</sub>, mol% in brackets.

**Table S7.** Catalytic performances of CuFeAg<sub>0.5</sub> under various reaction pressure<sup>a,b</sup>

| Press.<br>[MPa] | Conv.<br>[%] | Selectivity[%]  |                   |                    |      |                 | Alcohols distribution[%] <sup>c</sup> |               |               |              |                    | Total alcohols<br>STY<br>[g g <sub>cat</sub> <sup>-1</sup> h <sup>-1</sup> ] | LA<br>STY<br>[g g <sub>cat</sub> <sup>-1</sup> h <sup>-1</sup> ] |
|-----------------|--------------|-----------------|-------------------|--------------------|------|-----------------|---------------------------------------|---------------|---------------|--------------|--------------------|------------------------------------------------------------------------------|------------------------------------------------------------------|
|                 |              | CH <sub>4</sub> | C <sub>2+</sub> H | C <sub>2+</sub> =H | ROH  | CO <sub>2</sub> | MeOH                                  | EtOH          | PrOH          | BuOH         | C <sub>5+</sub> OH |                                                                              |                                                                  |
| 3.00            | 63.8         | 7.9             | 27.1              | 7.8                | 14.7 | 42.5            | 7.5<br>(1.1)                          | 26.0<br>(3.8) | 7.3<br>(1.1)  | 3.8<br>(0.6) | 55.4<br>(8.1)      | 0.22                                                                         | 0.111                                                            |
| 2.00            | 70.1         | 4.7             | 25.3              | 12.8               | 25.4 | 31.8            | 12.7<br>(3.2)                         | 25.1<br>(6.4) | 12.5<br>(3.2) | 5.6<br>(1.4) | 44.1<br>(11.2)     | 0.29                                                                         | 0.139                                                            |
| 1.00            | 50.6         | 10.1            | 25.4              | 8.7                | 14.1 | 41.7            | 18.7<br>(2.6)                         | 35.2<br>(5.0) | 11.8<br>(1.7) | 5.8<br>(0.8) | 28.5<br>(4.0)      | 0.13                                                                         | 0.041                                                            |
| 0.14            | 79.4         | 9.5             | 18.4              | 13.6               | 4.8  | 59.1            | 18.0<br>(0.9)                         | 18.1<br>(0.9) | 11.1<br>(0.5) | 5.2<br>(0.2) | 47.6<br>(2.3)      | 0.06                                                                         | 0.028                                                            |

<sup>a</sup> Activation conditions: 0.5 g precursor, H<sub>2</sub>: CO: CO<sub>2</sub>=1: 1: 2 (40 mL min<sup>-1</sup>), 2 °C min<sup>-1</sup>, 300 °C 2 h + 350 °C 1 h.

<sup>b</sup> Reaction conditions: 260 °C, H<sub>2</sub>/CO=2, 3000 mL g<sub>cat</sub><sup>-1</sup> h<sup>-1</sup>.

<sup>c</sup> Normalized data to S<sub>ROH</sub>, mol% in brackets.



**Table S8.** Catalytic performances of CuFeAg<sub>0.5</sub> under various WHSV<sup>a,b</sup>

| WHSV<br>[mL g <sub>cat</sub> <sup>-1</sup> h <sup>-1</sup> ] | Conv.<br>[%] | Selectivity[%]  |                   |                    |      |                 | Alcohols distribution[%] |                |               |              |                    | Total alcohols<br>STY<br>[g g <sub>cat</sub> <sup>-1</sup> h <sup>-1</sup> ] | LA<br>STY<br>[g g <sub>cat</sub> <sup>-1</sup> h <sup>-1</sup> ] |
|--------------------------------------------------------------|--------------|-----------------|-------------------|--------------------|------|-----------------|--------------------------|----------------|---------------|--------------|--------------------|------------------------------------------------------------------------------|------------------------------------------------------------------|
|                                                              |              | CH <sub>4</sub> | C <sub>2+</sub> H | C <sub>2+</sub> =H | ROH  | CO <sub>2</sub> | MeOH                     | EtOH           | PrOH          | BuOH         | C <sub>5+</sub> OH |                                                                              |                                                                  |
| 1500                                                         | 82.4         | 6.5             | 7.6               | 15.0               | 25.9 | 45.0            | 22.0<br>(5.7)            | 48.6<br>(12.6) | 11.1<br>(2.9) | 4.8<br>(1.2) | 13.5<br>(3.5)      | 0.13                                                                         | 0.022                                                            |
| 3000                                                         | 70.1         | 4.7             | 25.3              | 12.8               | 25.4 | 31.8            | 12.7<br>(3.2)            | 25.1<br>(6.4)  | 12.5<br>(3.2) | 5.6<br>(1.4) | 44.1<br>(11.2)     | 0.29                                                                         | 0.139                                                            |
| 4500                                                         | 43.8         | 9.1             | 25.0              | 18.5               | 5.3  | 42.1            | 17.2<br>(0.9)            | 36.1<br>(1.9)  | 9.9<br>(0.5)  | 4.8<br>(0.3) | 32.0<br>(1.7)      | 0.05                                                                         | 0.019                                                            |
| 6000                                                         | 26.5         | 11.7            | 20.3              | 25.2               | 1.1  | 41.7            | 19.6<br>(0.2)            | 35.6<br>(0.4)  | 9.4<br>(0.1)  | 7.8<br>(0.1) | 27.6<br>(0.3)      | 0.01                                                                         | 0.004                                                            |

<sup>a</sup> Activation conditions: 0.5 g precursor, H<sub>2</sub>: CO: CO<sub>2</sub>=1: 1: 2 (40 mL min<sup>-1</sup>), 2 °C min<sup>-1</sup>, 300 °C 2 h + 350 °C 1 h.

<sup>b</sup> Reaction conditions: 2 MPa, 260 °C, H<sub>2</sub>/CO=2.

<sup>c</sup> Normalized data to S<sub>ROH</sub>, mol% in brackets.

**Table S9.** Catalytic performances of Cu<sub>4</sub>Fe<sub>1</sub> and CuFeAg<sub>x</sub> with addition of 8% C<sub>2</sub>H<sub>4</sub><sup>a,b</sup>

| Catalysts <sup>a,b</sup>        | CO Conv.<br>[%] | C <sub>2</sub> H <sub>4</sub> Conv.<br>[%] | Selectivity[%]  |                   |                   |      |                 | Alcohols distribution[%] |      |      |      |                    |
|---------------------------------|-----------------|--------------------------------------------|-----------------|-------------------|-------------------|------|-----------------|--------------------------|------|------|------|--------------------|
|                                 |                 |                                            | CH <sub>4</sub> | C <sub>2</sub> +H | C <sub>3</sub> +H | ROH  | CO <sub>2</sub> | MeOH                     | EtOH | PrOH | BuOH | C <sub>5</sub> +OH |
| Cu <sub>4</sub> Fe <sub>1</sub> | 16.3            | 26.7                                       | 0.1             | 7.8               | 11.1              | 36.3 | 44.7            | 13.5                     | 33.3 | 46.3 | 1.9  | 5.0                |
| CuFeAg <sub>1</sub>             | 15.6            | 25.1                                       | 0.1             | 7.6               | 13.3              | 35.0 | 44.0            | 15.6                     | 46.9 | 31.8 | 1.6  | 4.1                |
| CuFeAg <sub>0.5</sub>           | 33.9            | 72.9                                       | 0.1             | 5.7               | 3.4               | 45.1 | 45.7            | 38.3                     | 6.6  | 52.1 | 1.4  | 1.6                |
| CuFeAg <sub>0.1</sub>           | 18.9            | 29.5                                       | 0.1             | 10.3              | 16.5              | 30.0 | 43.1            | 20.4                     | 45.4 | 28.9 | 1.5  | 3.8                |
| CuFeAg <sub>0.05</sub>          | 10.7            | 19.8                                       | 0.1             | 14.0              | 15.7              | 26.6 | 43.6            | 22.3                     | 44.4 | 27.7 | 1.4  | 4.2                |

<sup>a</sup> Activation conditions: 0.5 g precursor, H<sub>2</sub>: CO: CO<sub>2</sub>=1: 1: 2 (40 mL min<sup>-1</sup>), 2 °C min<sup>-1</sup>, 300 °C 2 h + 350 °C 1 h

<sup>b</sup> Reaction conditions: 2 MPa, 260 °C, H<sub>2</sub>/CO=2, 3000 mL g<sub>cat</sub><sup>-1</sup> h<sup>-1</sup>

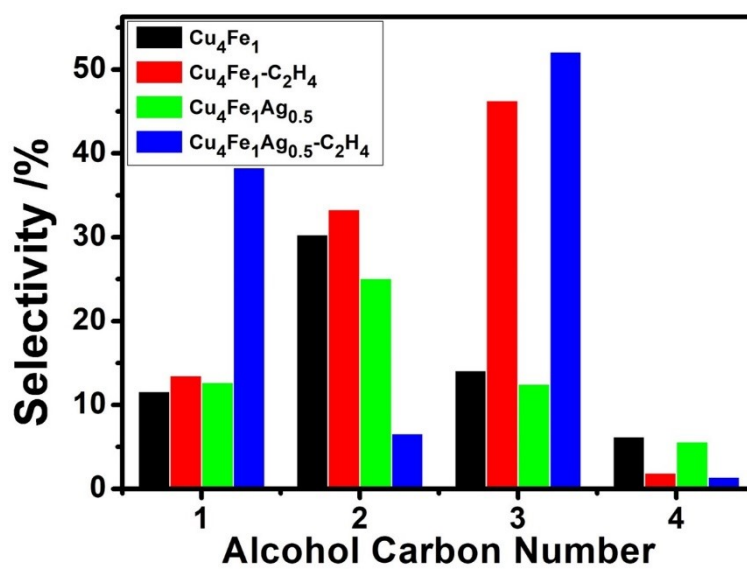

**Figure S9.** C<sub>1</sub>-C<sub>4</sub> alcohols selectivity over the Cu<sub>4</sub>Fe<sub>1</sub> and CuFeAg<sub>0.5</sub> catalysts before/after the addition of C<sub>2</sub>H<sub>4</sub>.
